# Supplementary material for: Systems Biology Analysis of Temporal Dynamics That Govern Endothelial Response to Cyclic Stretch
Source: MDPI journal article supplement (doi:10.3390/biom12121837), 2022-12-08

Supplementary Table S1

| Gene         | Forward Sequence             | Reverse Sequence               |
|--------------|------------------------------|--------------------------------|
| <b>E2F1</b>  | 5'-GGATTTACACCTTTTCCTGGAT-3' | 5'-CCTGGAAACTGACCATCAGTACCT-3' |
| <b>STAT1</b> | 5'-CTAGTGGAGTGGAAGCGGAG-3'   | 5'-CACCACAAACGAGCTCTGAA-3'     |
| <b>JUNB</b>  | 5'-GTCACCGAGGAGCAGGAGG-3'    | 5'-TCTTGTGCAGATCGTCCAGG-3'     |
| <b>ATF2</b>  | 5'-ACCATGGTGCCTAGTGTTCC-3'   | 5'-GTGGCTGGCTGTTGTAATGA-3'     |

Supplementary Figure S1

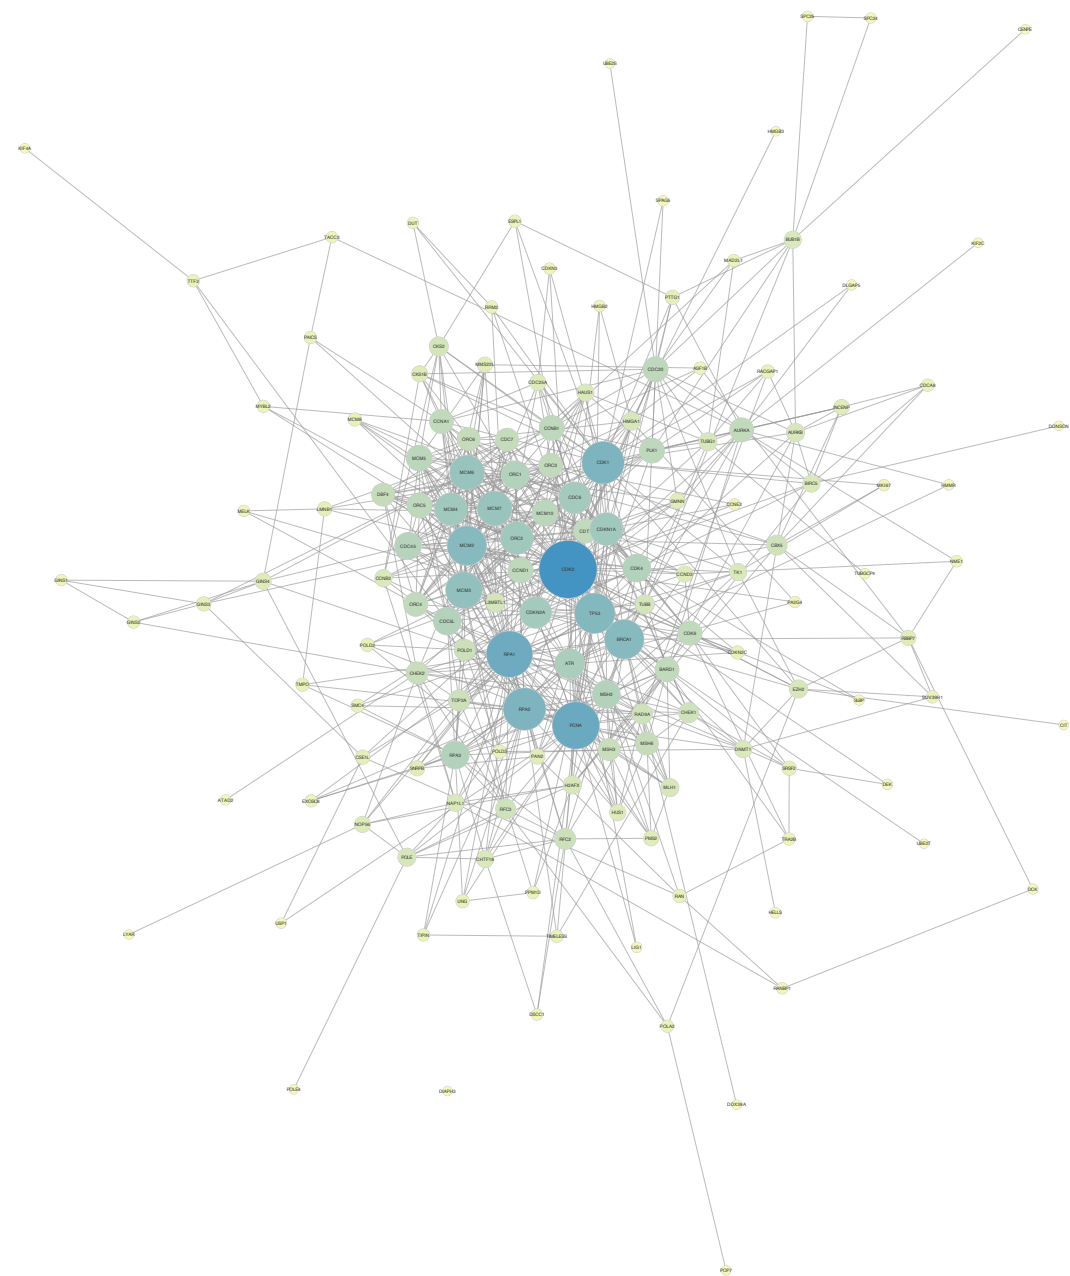

Supplementary Figure S2

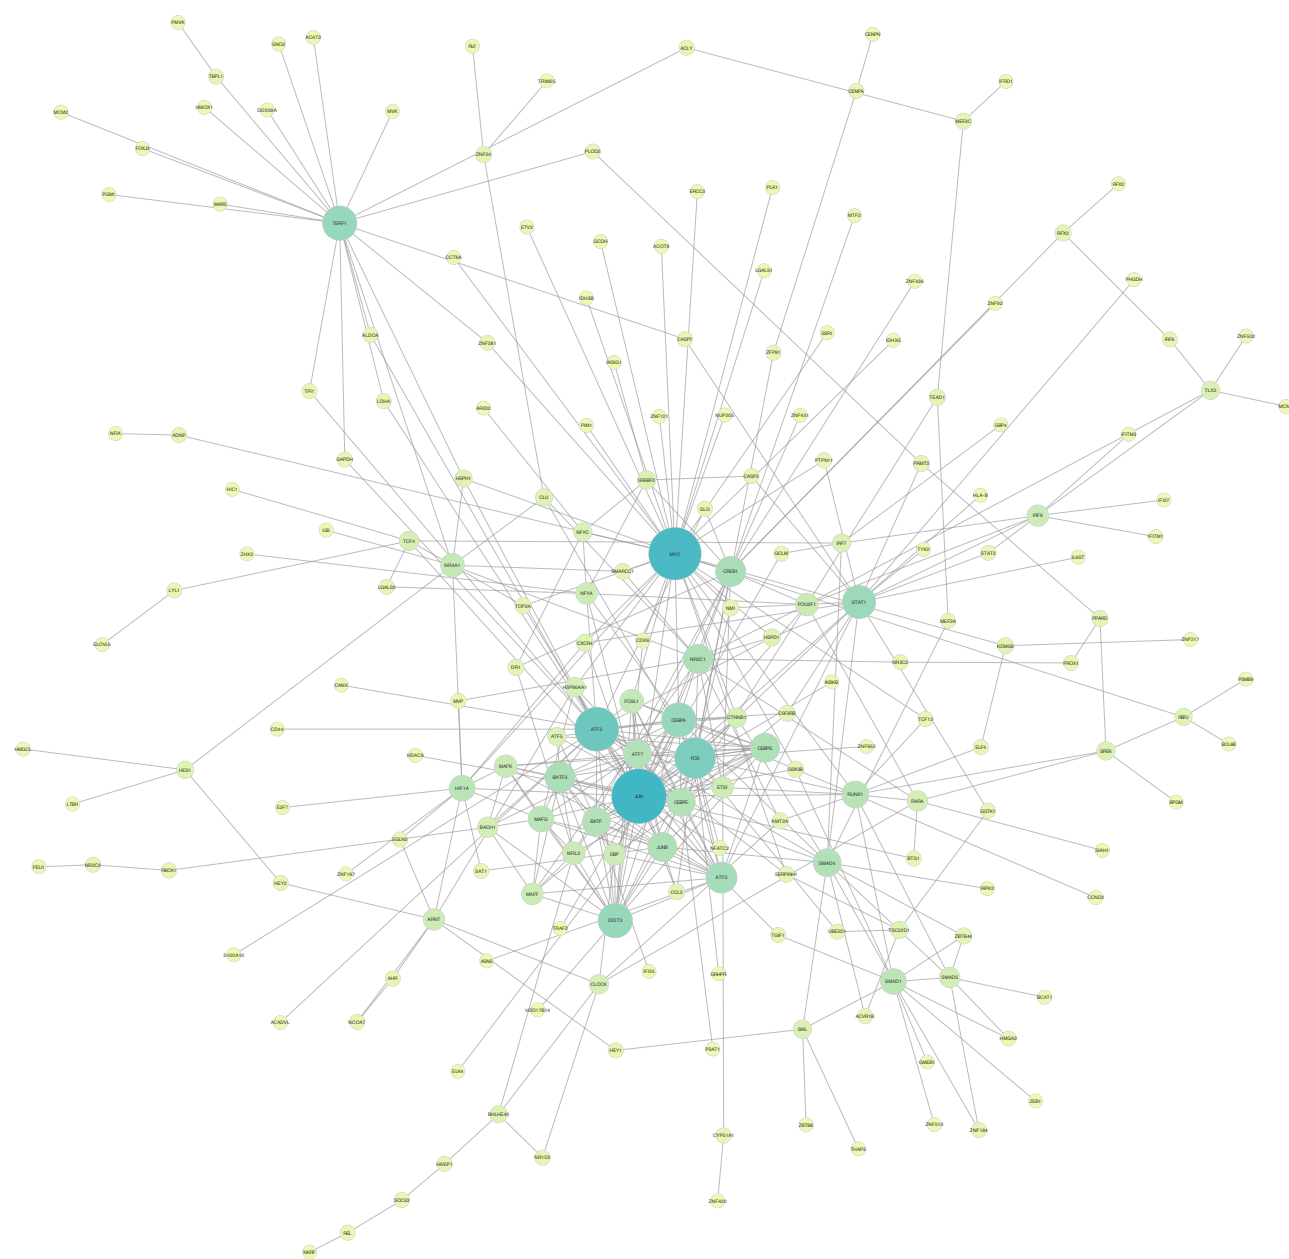

Supplement: s1 [file s1]
